# Supplementary material
Source: Springer Nature journal article supplement (https://www.springermedizin.de/resource/supplementary/12876_2012_802_MOESM3_ESM.pdf/9437510)

**A**

Days of absence from work at diagnosis (%)

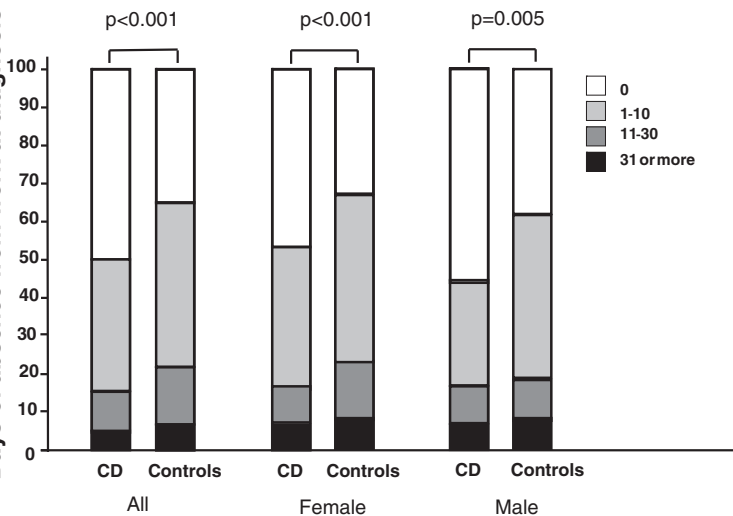**B**

Days of absence from work after one year (%)

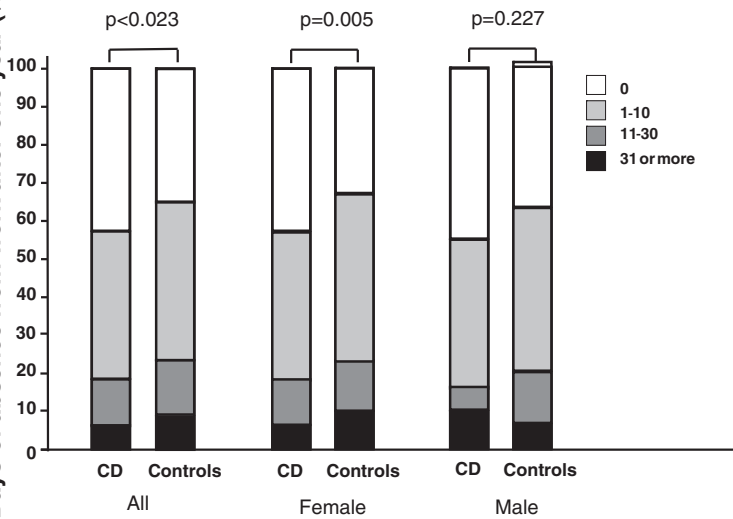

Supplement: MOESM3 [file 9437510]
